# Supplementary material for: An Optimization Protocol for MRI Examination Resource Allocation Based on Demand Forecasting and Linear Programming
Source: Research Square preprint supplement (doi:10.21203/rs.3.rs-5598439/v1), 2024-12-23
Supplement: Supplementary file 1 [file 2d43c5ad4a3a760472fc424c.docx]

**Table 1**

Prediction accuracy of various methods

|  | MSE | MAE | MAPE | R |
| --- | --- | --- | --- | --- |
| ARIMA model | 1370.43 | 18.29 | 0.1661 | 0.9282 |
| ARIMAX model | 1289.08 | 17.70 | 0.1613 | 0.9273 |
| NAR model | 433.20 | 14.67 | 0.1608 | 0.9287 |
| NARX model | 333.09 | 14.04 | 0.2108 | 0.9549 |

**Table 2**

Prediction results

|  | 24/10  Mon. | 25/10  Tues. | 26/10  Wed. | 27/10  Thur. | 28/10  Fri. | 29/10  Sat. | 30/10  Sun. |
| --- | --- | --- | --- | --- | --- | --- | --- |
| MRI examination demand | 196 | 174 | 149 | 151 | 143 | 48 | 48 |

**Table 3**

Daily inspection volume

|  | 24/10  Mon. | 25/10  Tues. | 26/10  Wed. | 27/10  Thur. | 28/10  Fri. | 29/10  Sat. | 30/10  Sun. |
| --- | --- | --- | --- | --- | --- | --- | --- |
| MR1 | 72 | 72 | 72 | 64 | 45 | 0 | 0 |
| MR2 | 58 | 58 | 58 | 51 | 58 | 7 | 7 |
| MR3 | 41 | 41 | 41 | 41 | 41 | 41 | 41 |
